# Supplementary material for: The cytokine and chemokine expression profile of nucleus pulposus cells: implications for degeneration and regeneration of the intervertebral disc
Source: PubMed Central journal article supplement (PMC3979161; doi:10.1186/ar4408), 2013-12-11
Supplement: ar4408-S1.pdf [file ar4408-S1.pdf]

| (I) | 1            | 2             | 3            | 4           | 5            | 6        | 7              | 8            | 9            | 10          | 11            | 12            |
|-----|--------------|---------------|--------------|-------------|--------------|----------|----------------|--------------|--------------|-------------|---------------|---------------|
| A   | <b>18S</b>   | <b>GAPDH</b>  | <b>HPRT1</b> | <b>ACTB</b> | <b>PGK</b>   | IL-17RA  | IL-22Ra1       | IFN-γRa      | <b>gp130</b> | CXCL10      | CCL19         | CCR3          |
| B   | IL-1α        | IL-15         | IL-17F       | CSF3        | <b>IL-6R</b> | IL-17RB  | IL-23R         | IFN-γRβ      | <b>CXCL1</b> | <b>CCL2</b> | CCL20         | CCR5          |
| C   | <b>IL-1β</b> | <b>IL-16</b>  | <b>IL-18</b> | IFN-γ       | IL-7R        | IL-17RC  | IL-12Rβ1       | OSMR         | <b>CXCL2</b> | <b>CCL3</b> | <b>CX3CL1</b> | CCR6          |
| D   | IL-4         | IL-17A        | <b>IL-20</b> | <b>OSM</b>  | IL-10Rα      | IL-17RD  | <b>TNF-R55</b> | <b>LIFRα</b> | <b>CXCL3</b> | <b>CCL4</b> | <b>CXCR1</b>  | CCR7          |
| E   | <b>IL-6</b>  | IL-17B        | IL-23        | <b>LIF</b>  | IL-10Rβ      | IL-18Rα  | <b>TNF-R75</b> | IL-1Ra       | CXCL5        | <b>CCL5</b> | <b>CXCR2</b>  | CCR8          |
| F   | IL-7         | IL-17C        | <b>TNF-α</b> | IL-1RI      | IL-11Rα      | IL-18Rβ  | GM-CSFRα       | IL-1RAcP     | CXCL6        | <b>CCL7</b> | CXCR3         | <b>CX3CR1</b> |
| G   | IL-10        | <b>IL-17D</b> | TNF-β        | IL-1RII     | IL-15Rα      | IL-20RI  | GM-CSFRβ       | ICE          | <b>CXCL8</b> | CCL8        | <b>CCR1</b>   | Duffy         |
| H   | IL-11        | IL-17E        | CSF2         | IL-4R       | <b>CD4</b>   | IL-20RII | G-CSFR         | TACE         | CXCL9        | CCL13       | <b>CCR2</b>   | D6            |

| (II) | 1                   | 2                   | 3                   | 4                   | 5                   | 6            | 7                   | 8                   | 9                   | 10                  | 11                  | 12                  |
|------|---------------------|---------------------|---------------------|---------------------|---------------------|--------------|---------------------|---------------------|---------------------|---------------------|---------------------|---------------------|
| A    | <b>Hs99999901s1</b> | <b>Hs99999905m1</b> | <b>Hs99999909m1</b> | <b>Hs99999903m1</b> | <b>Hs99999906m1</b> | Hs01064648m1 | Hs00222035m1        | Hs00166223m1        | <b>Hs01006727m1</b> | Hs00171042m1        | Hs00171149m1        | Hs00266213s1        |
| B    | Hs00174092m1        | Hs00174106m1        | Hs00369400m1        | Hs999999083m1       | <b>Hs01075667m1</b> | Hs00914532m1 | Hs00332759m1        | Hs00194264m1        | <b>Hs00236937m1</b> | <b>Hs00234140m1</b> | Hs00171125m1        | Hs00152917m1        |
| C    | <b>Hs00174097m1</b> | <b>Hs00189606m1</b> | <b>Hs00155517m1</b> | Hs00174143m1        | Hs00902334m1        | Hs00262062m1 | Hs00538167m1        | Hs00384278m1        | <b>Hs00236966m1</b> | <b>Hs00234142m1</b> | <b>Hs00171086m1</b> | Hs00171121m1        |
| D    | Hs00174122m1        | Hs00174383m1        | <b>Hs00218888m1</b> | <b>Hs00171165m1</b> | Hs00387004m1        | Hs00296982m1 | <b>Hs01042313m1</b> | <b>Hs00158730m1</b> | <b>Hs00171061m1</b> | <b>Hs99999148m1</b> | <b>Hs00174146m1</b> | Hs01013469m1        |
| E    | <b>Hs00174131m1</b> | Hs00975262m1        | Hs00372324m1        | <b>Hs00171455m1</b> | Hs00175123m1        | Hs00977691m1 | <b>Hs00961755m1</b> | Hs00174099m1        | Hs00171085m1        | <b>Hs00174575m1</b> | <b>Hs00174304m1</b> | Hs00174764m1        |
| F    | Hs00174202m1        | Hs00171163m1        | <b>Hs00174128m1</b> | Hs00991002m1        | Hs00234415m1        | Hs00977695m1 | Hs00538896m1        | Hs00370506m1        | Hs00237017m1        | <b>Hs00171147m1</b> | Hs00171041m1        | <b>Hs00365842m1</b> |
| G    | Hs00174086m1        | <b>Hs00370528m1</b> | Hs00236874m1        | Hs00174759m1        | Hs00542604m1        | Hs00205346m1 | Hs00166144m1        | Hs00169146m1        | <b>Hs00174103m1</b> | Hs00271615m1        | <b>Hs00174298m1</b> | Hs01011079s1        |
| H    | Hs00174148m1        | Hs00224471m1        | Hs00171266m1        | Hs00166237m1        | <b>Hs00181217m1</b> | Hs00376373m1 | Hs01114427m1        | Hs00234224m1        | Hs00171065m1        | Hs00234646m1        | <b>Hs00174150m1</b> | Hs00174299m1        |

### Additional file 1. Low Density Array (LDA) Design

(I) Internal reference and target genes investigated by cDNA LDA, green indicates internal reference genes. Highlighted genes are those selected for inclusion in additional real-time q-PCR analysis.

(II) Catalogue numbers for pre-designed primer-probe sequences used in LDA analysis. Highlighted catalogue numbers are those for assays used in additional real-time q-PCR analysis. LDAs and primer-probe assays were supplied by Applied Biosystems (UK).
